# Supplementary material
Source: HighWire-hosted journal article supplement (https://bmjopenquality.bmj.com/highwire/filestream/136141/field_highwire_adjunct_files/1/ds4945.pdf)

# Oxygen Delivery Process Flow

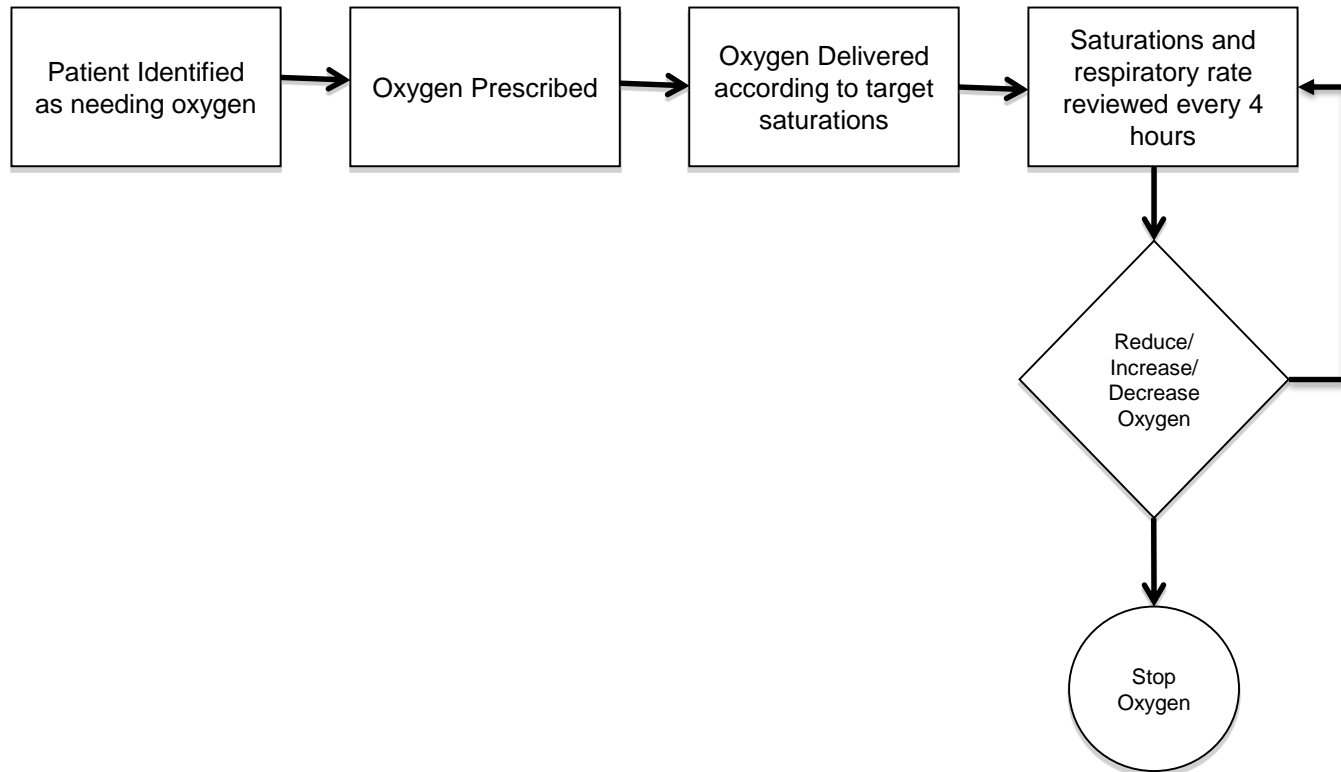

Supplement: ds4945.pdf [file ds4945.pdf]
